# Supplementary material
Source: PubMed Central journal article supplement (PMC4414668)
Supplement: NIHMS638189-supplement-Supp_Material.pdf [file NIHMS638189-supplement-Supp_Material.pdf]

A review of responsive MRI contrast agents: 2005-2014

Dina V. Hingorani<sup>1</sup>, Adam S. Bernstein,<sup>2</sup> and Mark D. Pagel<sup>1,2,3,4</sup>

1. Department of Chemistry and Biochemistry, University of Arizona

2. Department of Biomedical Engineering, University of Arizona

3. Department of Medical Imaging, University of Arizona

4. University of Arizona Cancer Center, University of Arizona

**Supporting Information**

The following table lists the chemical structures, the intended biomarkers, and the references for each responsive MRI contrast agent presented in this review.

| Responsive to:                  | Structure                                                                                                                                                                                                                                                                                                                                                                        | Reference #: |
|---------------------------------|----------------------------------------------------------------------------------------------------------------------------------------------------------------------------------------------------------------------------------------------------------------------------------------------------------------------------------------------------------------------------------|--------------|
| urokinase-plasminogen activator | 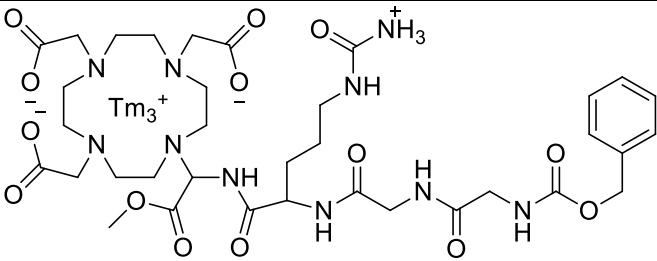 <p>The structure shows a central Tm<sup>3+</sup> ion coordinated by a 10-membered polyaza macrocyclic ligand with four acetate counterions. A peptide chain is attached to the macrocycle, ending in a benzyl carbamate group.</p>                                                           | 51,52        |
| cathepsin D                     |  <p>The structure features a central Tm<sup>3+</sup> ion coordinated by a 10-membered polyaza macrocyclic ligand with four acetate counterions. A peptide chain is attached to the macrocycle, ending in a fluorinated aromatic group with a hydroxyl and a carboxylic acid substituent.</p> | 53           |
| transglutaminase                |  <p>The structure shows a central Tm<sup>3+</sup> ion coordinated by a 10-membered polyaza macrocyclic ligand with four acetate counterions. A long alkyl chain is attached to the macrocycle, ending in a protonated amine group (H<sub>3</sub>N<sup>+</sup>).</p>                          | 54           |
| β-galactosidase                 |  <p>The structure features a central Yb<sup>3+</sup> ion coordinated by a 10-membered polyaza macrocyclic ligand with four acetate counterions. A galactose sugar moiety is attached to the macrocycle via a benzyl ether linkage.</p>                                                       | 55           |

|                                                                  |                                                                                                                                                                                                                                                                                                                                                                                                                                                |           |
|------------------------------------------------------------------|------------------------------------------------------------------------------------------------------------------------------------------------------------------------------------------------------------------------------------------------------------------------------------------------------------------------------------------------------------------------------------------------------------------------------------------------|-----------|
| <p>esterase</p>                                                  | 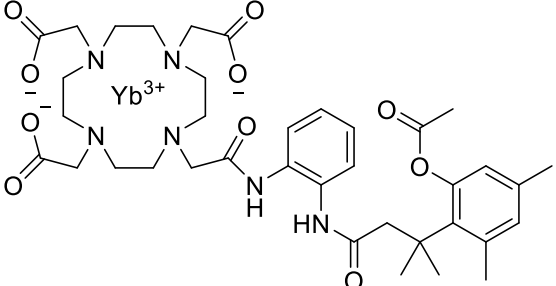 <p>The structure shows a Yb<sup>3+</sup> ion coordinated by a macrocyclic ligand with four nitrogen atoms. Each nitrogen is part of a side chain containing a carboxylate group. One of these side chains is further substituted with a complex organic group, including a benzamide moiety and a branched aliphatic chain with a methyl group.</p>         | <p>56</p> |
| <p>cytosine deaminase</p>                                        |  <p>X = H or F</p>                                                                                                                                                                                                                                                                                                                                            | <p>57</p> |
| <p>protein kinase A</p>                                          | <p>LRRASLG peptide</p>                                                                                                                                                                                                                                                                                                                                                                                                                         | <p>58</p> |
| <p><math>\beta</math>-galactosidase,<br/>human serum albumin</p> |  <p>The structure shows a Gd<sup>3+</sup> ion coordinated by a macrocyclic ligand with four nitrogen atoms. Each nitrogen is part of a side chain containing a carboxylate group. One of these side chains is further substituted with a complex organic group, including a benzamide moiety and a fluorinated sugar derivative (CHF<sub>2</sub> group).</p> | <p>59</p> |
| <p>myeloperoxidase</p>                                           |  <p>The structure shows a Gd<sup>3+</sup> ion coordinated by a macrocyclic ligand with four nitrogen atoms. Each nitrogen is part of a side chain containing a carboxylate group. One of these side chains is further substituted with a complex organic group, including a hydroxyindole derivative.</p>                                                   | <p>60</p> |
| <p>Legumain</p>                                                  |  <p>The structure shows a Gd<sup>3+</sup> ion coordinated by a macrocyclic ligand with four nitrogen atoms. Each nitrogen is part of a side chain containing a carboxylate group. One of these side chains is further substituted with a complex organic group, including a hydroxyindole derivative and a peptide chain (HN-LN(R)AAKKKK).</p>             | <p>61</p> |

|                                         |                                                                                      |           |
|-----------------------------------------|--------------------------------------------------------------------------------------|-----------|
| <p>tyrosinase</p>                       | 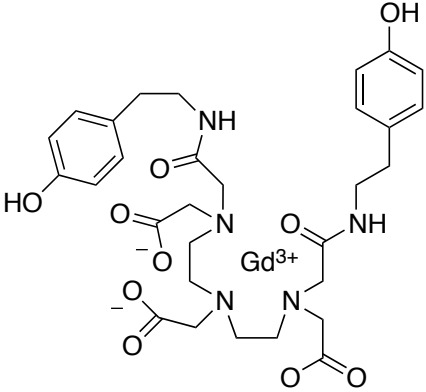   | <p>62</p> |
| <p><math>\beta</math>-galactosidase</p> |    | <p>63</p> |
| <p>Furin</p>                            |  | <p>64</p> |
| <p>matrix metalloproteinases</p>        |  | <p>65</p> |

|                                  |                                                                                      |           |
|----------------------------------|--------------------------------------------------------------------------------------|-----------|
| <p>Matrix metalloproteinases</p> | 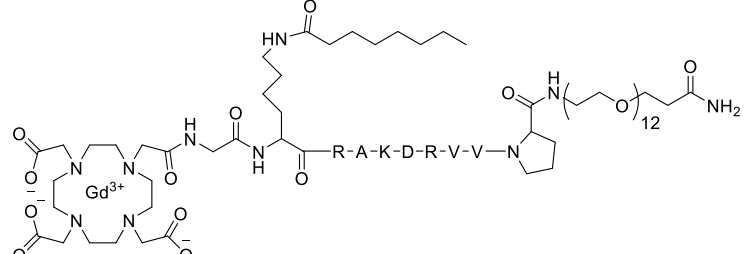   | <p>65</p> |
| <p>Matrix metalloproteinases</p> |    | <p>65</p> |
| <p>matrix metalloproteinases</p> |    | <p>66</p> |
| <p>lipase</p>                    |  | <p>68</p> |
| <p>esterase</p>                  |  | <p>70</p> |

|                         |                                                                                      |       |
|-------------------------|--------------------------------------------------------------------------------------|-------|
| glutamate decarboxylase | 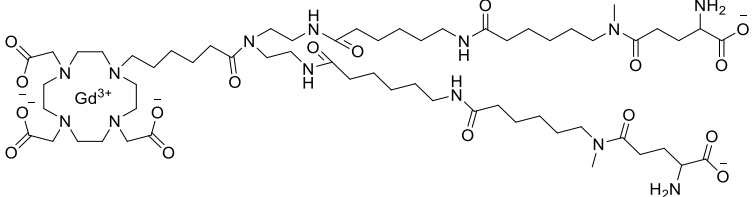   | 71    |
| tyrosinase              |    | 72    |
| tyrosinase              |    | 72    |
| tyrosinase              |   | 72    |
| β-galactosidase         |  | 73,74 |

|                                      |  |           |
|--------------------------------------|--|-----------|
| <p>matrix metalloprotease-2</p>      |  | <p>77</p> |
| <p>secreted alkaline phosphatase</p> |  | <p>80</p> |
| <p>caspase-3</p>                     |  | <p>82</p> |
| <p><math>\beta</math>-Lactamase</p>  |  | <p>83</p> |

|                                                                                                     |                                                                                      |       |
|-----------------------------------------------------------------------------------------------------|--------------------------------------------------------------------------------------|-------|
| β-galactosidase                                                                                     | 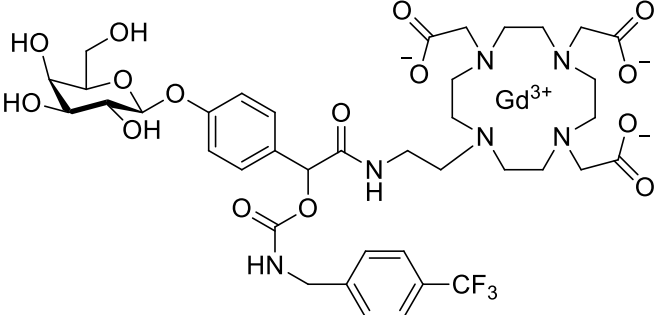   | 84    |
| β-galactosidase                                                                                     |    | 85    |
| β-galactosidase                                                                                     |    | 85    |
| creatine kinase                                                                                     |    | 86    |
| pyruvate dehydrogenase, Krebs cycle metabolism, pH,                                                 |    | 87    |
| alanine transaminase                                                                                |   | 88    |
| carbonic anhydrase, mitogen-activated protein kinase, pyruvate dehydrogenase, lactate dehydrogenase |   | 89-95 |
| glutaminase                                                                                         |  | 96    |
| Branched chain amino acid transaminase                                                              |   | 97    |
| succinate dehydrogenase                                                                             |  | 98    |

|                     |                                                                                                                                         |     |
|---------------------|-----------------------------------------------------------------------------------------------------------------------------------------|-----|
| hexokinase          | 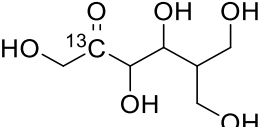                                                      | 99  |
| carboxypeptidase G2 |                                                       | 100 |
| DNA                 |  <p style="text-align: center;">n = 17 (average)</p> | 104 |
| DNA                 |                                                     | 105 |



|               |                                                                                                                                                                                                                                                                                                                                                                                                                                                                                                                         |     |
|---------------|-------------------------------------------------------------------------------------------------------------------------------------------------------------------------------------------------------------------------------------------------------------------------------------------------------------------------------------------------------------------------------------------------------------------------------------------------------------------------------------------------------------------------|-----|
| DNA           | 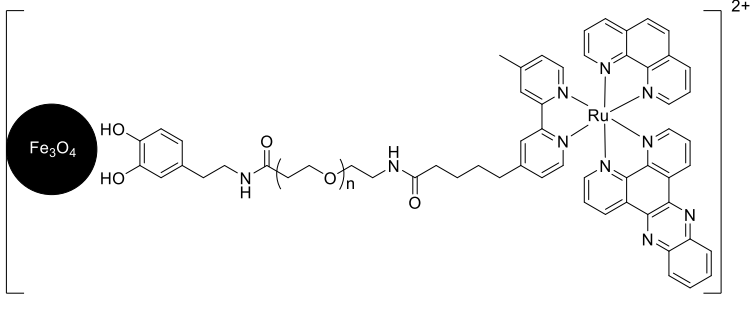 <p>The structure shows an <math>\text{Fe}_3\text{O}_4</math> nanoparticle (black circle) attached to a polymer chain. The polymer chain consists of a hydroxybenzyl group, a poly(ethylene glycol) (PEG) linker of length <math>n</math>, and a terminal amide group. This amide group is linked to a complex ligand system that includes a Ruthenium (Ru) center coordinated to two terpyridine-like ligands and a phenyl ring.</p> | 105 |
| DNA           |  <p>The structure shows two Nd<sup>3+</sup> ions coordinated to two separate macrocyclic ligands. Each macrocycle has four nitrogen atoms and two amide groups. The two macrocycles are linked together via a central phenylene ring.</p>                                                                                                                                                                                             | 106 |
| adenosine     |  <p>The structure shows a Gd<sup>3+</sup> ion coordinated to a macrocyclic ligand with four nitrogen atoms and four amide groups. The ligand is attached to a DNA strand at the 3' position, with the sequence NH-G-T-G-A-C-T-G-G-A-C-C-5'.</p>                                                                                                                                                                                       | 107 |
| carbohydrates |  <p>The structure shows a Gd<sup>3+</sup> ion coordinated to a macrocyclic ligand with four nitrogen atoms and four amide groups. The ligand is attached to a DNA strand at the 3' position, with the sequence NH-G-T-G-A-C-T-G-G-A-C-C-5'. A boronic acid group (B(OH)<sub>2</sub>) is also present, which can interact with the DNA strand.</p>                                                                                    | 119 |
| pyrophosphate |  <p>The structure shows a Gd<sup>3+</sup> ion coordinated to a macrocyclic ligand with four nitrogen atoms and four amide groups. The ligand is attached to a DNA strand at the 3' position, with the sequence NH-G-T-G-A-C-T-G-G-A-C-C-5'. Two Zn<sup>2+</sup> ions are coordinated to the DNA strand, and a pyrophosphate (PPi) group is coordinated to both Zn<sup>2+</sup> ions.</p>                                            | 120 |

|                  |                                                                                                                                                                |     |
|------------------|----------------------------------------------------------------------------------------------------------------------------------------------------------------|-----|
| phosphate esters | 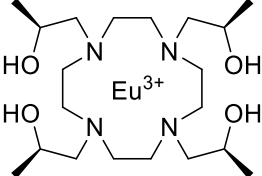                                                                             | 123 |
| Redox State      |                                                                              | 126 |
| Redox State      |                                                                              | 127 |
| Redox State      |  <p data-bbox="755 1228 950 1270">M= Co<sup>2+</sup> or Co<sup>3+</sup></p> | 128 |
| Redox State      |                                                                            | 129 |
| Redox State      |                                                                            | 131 |

|                                  |                                                                                      |     |
|----------------------------------|--------------------------------------------------------------------------------------|-----|
| Redox State                      | 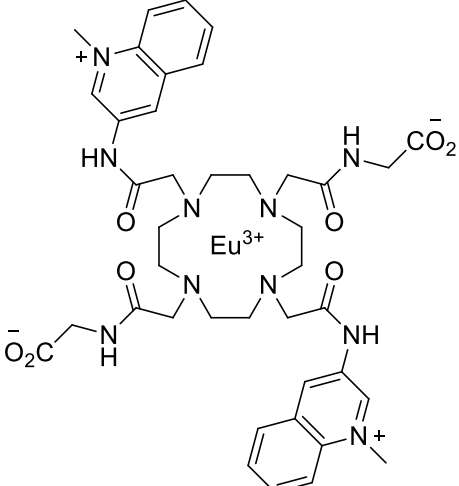   | 131 |
| Redox State                      |   | 132 |
| hydrogen peroxide                |  | 133 |
| Visible Light, Redox State, Temp |  | 134 |

|              |                                                                                      |     |
|--------------|--------------------------------------------------------------------------------------|-----|
| Redox State  | 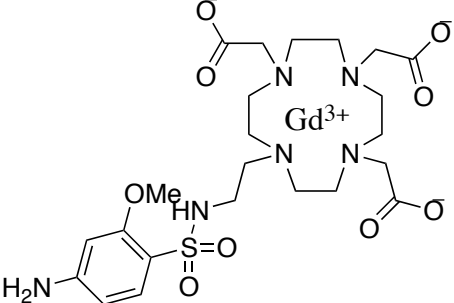   | 135 |
| Redox State  |    | 137 |
| Redox State  |    | 137 |
| copper ions  |   | 141 |
| zinc ions    |  | 142 |
| calcium ions |  | 143 |

|              |                                                                                                                                                        |     |
|--------------|--------------------------------------------------------------------------------------------------------------------------------------------------------|-----|
| calcium ions | 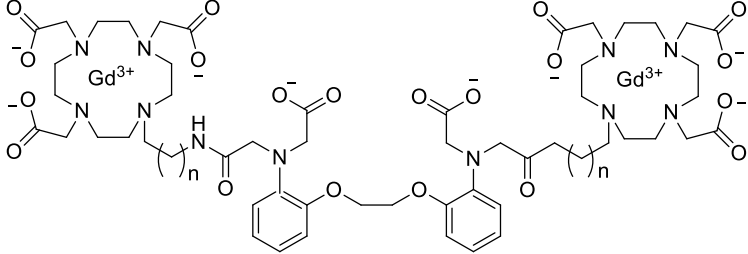 <p style="text-align: center;"><math>n = 1 \text{ or } 2</math></p> | 144 |
| copper ions  |                                                                      | 145 |
| copper ions  |                                                                     | 146 |
| zinc ions    |                                                                    | 147 |

|                |                                                                                      |     |
|----------------|--------------------------------------------------------------------------------------|-----|
| zinc ions      | 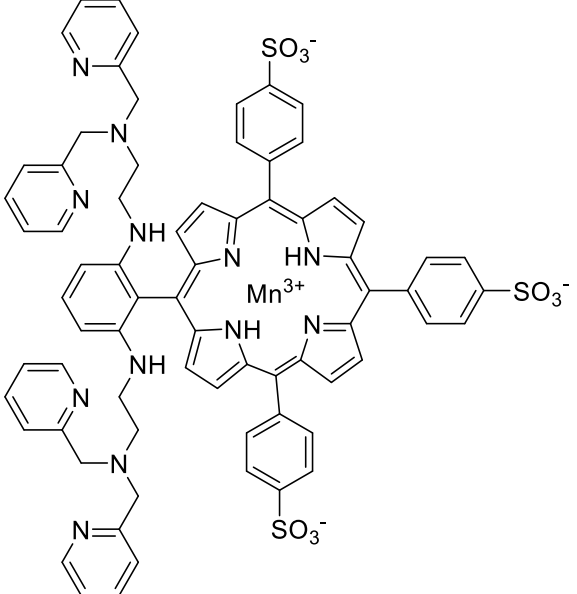   | 149 |
| zinc ions      |   | 150 |
| manganese ions |  | 151 |

|                            |                                                                                                                                    |     |
|----------------------------|------------------------------------------------------------------------------------------------------------------------------------|-----|
| iron ions                  | 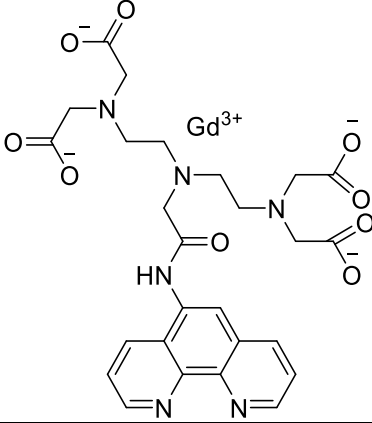                                                 | 152 |
| calcium and magnesium ions |                                                  | 153 |
| uranium ions               |                                                 | 154 |
| Metal ions                 |  <p>R<sup>2</sup>: H</p> <p>R<sup>2</sup>:</p> | 156 |

|              |                                                                                     |     |
|--------------|-------------------------------------------------------------------------------------|-----|
| calcium ions | 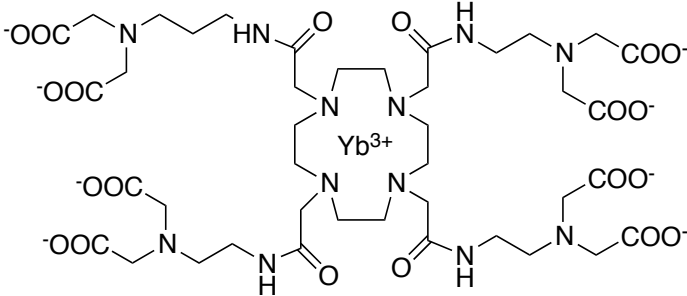  | 157 |
| pH           |   | 169 |
| pH           |  | 170 |



|    |                                                                                      |         |
|----|--------------------------------------------------------------------------------------|---------|
| pH | 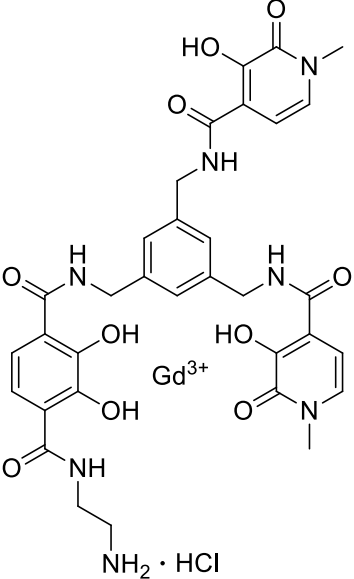   | 170     |
| pH |   | 171     |
| pH |  | 172     |
| pH |  | 173,174 |

|             |                                               |     |
|-------------|-----------------------------------------------|-----|
| pH          |                                               | 175 |
| pH          |                                               | 176 |
| pH          |                                               | 177 |
| pH          |                                               | 178 |
| pH          |                                               | 46  |
| Temperature | <p>R = H or CH<sub>2</sub>COO<sup>-</sup></p> | 184 |

|             | Ln = Dy or Eu                                                                                                                  |     |
|-------------|--------------------------------------------------------------------------------------------------------------------------------|-----|
| Temperature | 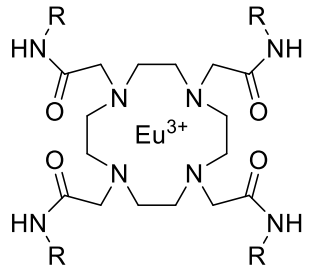 <p>R = Glycine or Glycine-Phenylalanine</p> | 185 |
| Temperature |                                              | 186 |
